# Supplementary material for: Characterizing a CT esophagram protocol after flexible endoscopic diverticulotomy for Zenker’s diverticulum: a retrospective series
Source: PubMed Central journal article supplement — Transl Gastroenterol Hepatol. 2022 Oct 25;7:34. doi: 10.21037/tgh-20-269 (PMC9469010; doi:10.21037/tgh-20-269), 2022-10-25
Supplement: tgh-07-20-269-dss.pdf [file tgh-07-20-269-dss.pdf]

| Data Sharing Statement |                                                                                                                                                     |                                                                                                                                                                                                                                                                                                                            |
|------------------------|-----------------------------------------------------------------------------------------------------------------------------------------------------|----------------------------------------------------------------------------------------------------------------------------------------------------------------------------------------------------------------------------------------------------------------------------------------------------------------------------|
| Article Info           | <a href="http://dx.doi.org/10.21037/tgh-20-269">http://dx.doi.org/10.21037/tgh-20-269</a>                                                           |                                                                                                                                                                                                                                                                                                                            |
| Item                   | Question                                                                                                                                            | Authors' Response<br>(place "-" if not applicable)                                                                                                                                                                                                                                                                         |
| 1                      | Would you like to share data collected for your study to others?                                                                                    | Yes                                                                                                                                                                                                                                                                                                                        |
| 2                      | If not, would you like to share the reason for your decision?                                                                                       | -                                                                                                                                                                                                                                                                                                                          |
| 3                      | What data in particular will be shared?                                                                                                             | All CT esophagram findings (incidental or otherwise) documented after flexible endoscopic diverticulotomy in descriptive form will be shared upon request and only after consultation with our Institutional Review Board. Postoperative findings on CT esophagram from this procedure have not previously been described. |
| 4                      | Any other documents will be shared? Such as study protocol, statistical analysis plan, informed consent form, clinical study report, analytic code. | The approved study protocol will be shared, if requested and only after consultation with our Institutional Review Board.                                                                                                                                                                                                  |
| 5                      | When will data availability begin?                                                                                                                  | From publication date.                                                                                                                                                                                                                                                                                                     |
| 6                      | When will data availability end?                                                                                                                    | One year within publication date, as data may update and/or augment over time.                                                                                                                                                                                                                                             |
| 7                      | To whom will you share the data?                                                                                                                    | Gastroenterologists, radiologists, and surgeons interested in endoscopic management of symptomatic Zenker's diverticulum and its postoperative imaging.                                                                                                                                                                    |
| 8                      | For what type of analysis or purpose?                                                                                                               | For the purpose of describing a CT esophagram protocol in patients who undergo flexible endoscopic diverticulotomy for symptomatic Zenker's diverticulum management.                                                                                                                                                       |
| 9                      | How or where can the data/documents be obtained?                                                                                                    | Please email <a href="mailto:d.banerjee@ufl.edu">d.banerjee@ufl.edu</a> to request the shared data.                                                                                                                                                                                                                        |
| 10                     | Any other restrictions?                                                                                                                             | Each request for data will be considered after weighing the benefits and risks of data that can potentially be shared and only after consultation with our Institutional Review Board.                                                                                                                                     |
